# Supplementary material for: HA/MgO nanocrystal-based hybrid hydrogel with high mechanical strength and osteoinductive potential for bone reconstruction in diabetic rats
Source: Royal Society of Chemistry journal article supplement (doi:10.1039/d0tb02553d), 2020-12-14
Supplement: d0tb02553d1.pdf [file d0tb02553d1.pdf]

## Supporting information

**A**

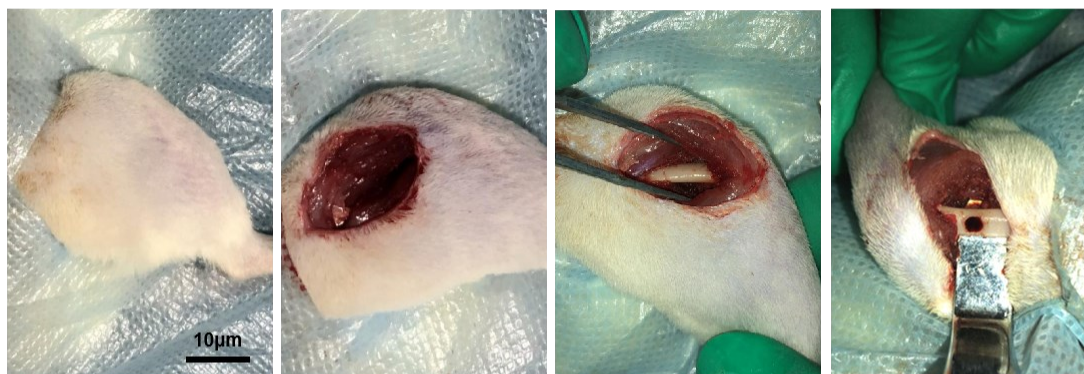

**B**

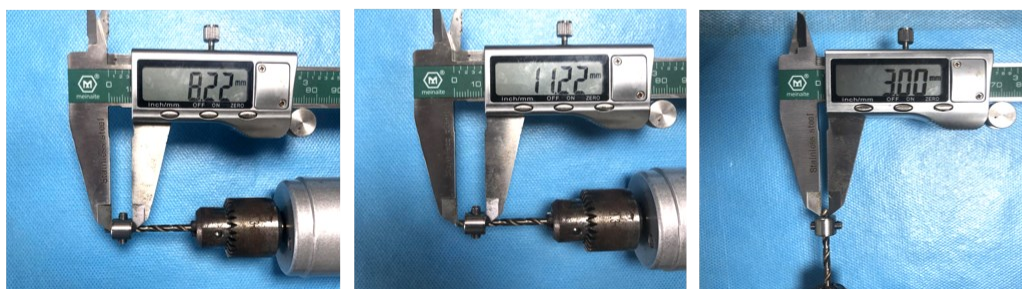

Fig S1 (A) The establishment process of femoral defect model in type 1 diabetes mellitus SD rats. (B) A defect with 3 mm in diameter and 3 mm in depth was created on femur by an electric drill.

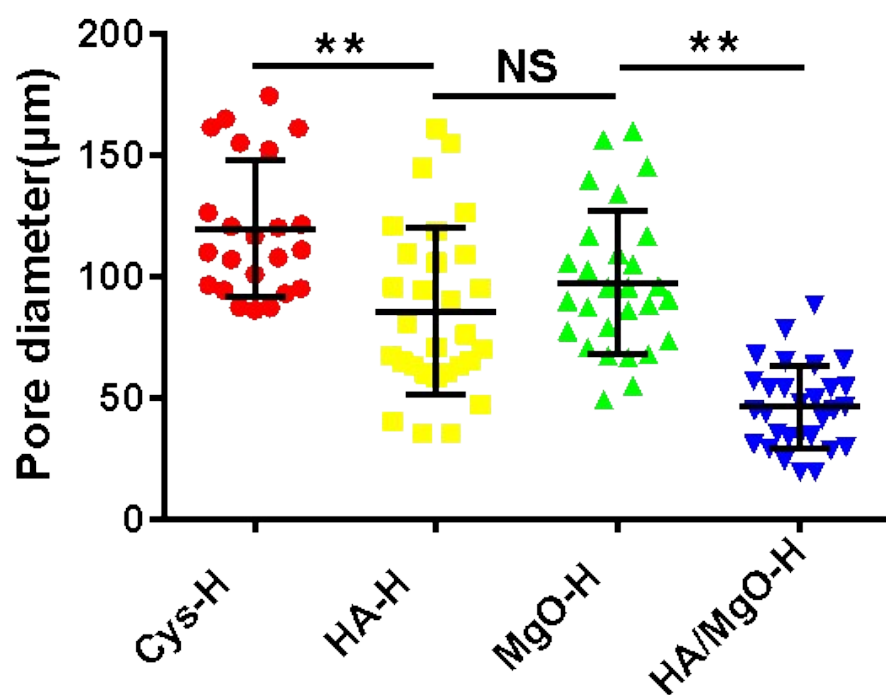

Fig S2 Quantitative analysis of pore diameter of Cys-H, HA-H, MgO-H and HA/MgO-H scaffold by Image J. (\*  $p < 0.05$ , \*\*  $p < 0.01$ , NS means no statistical significance,  $n > 3$ )

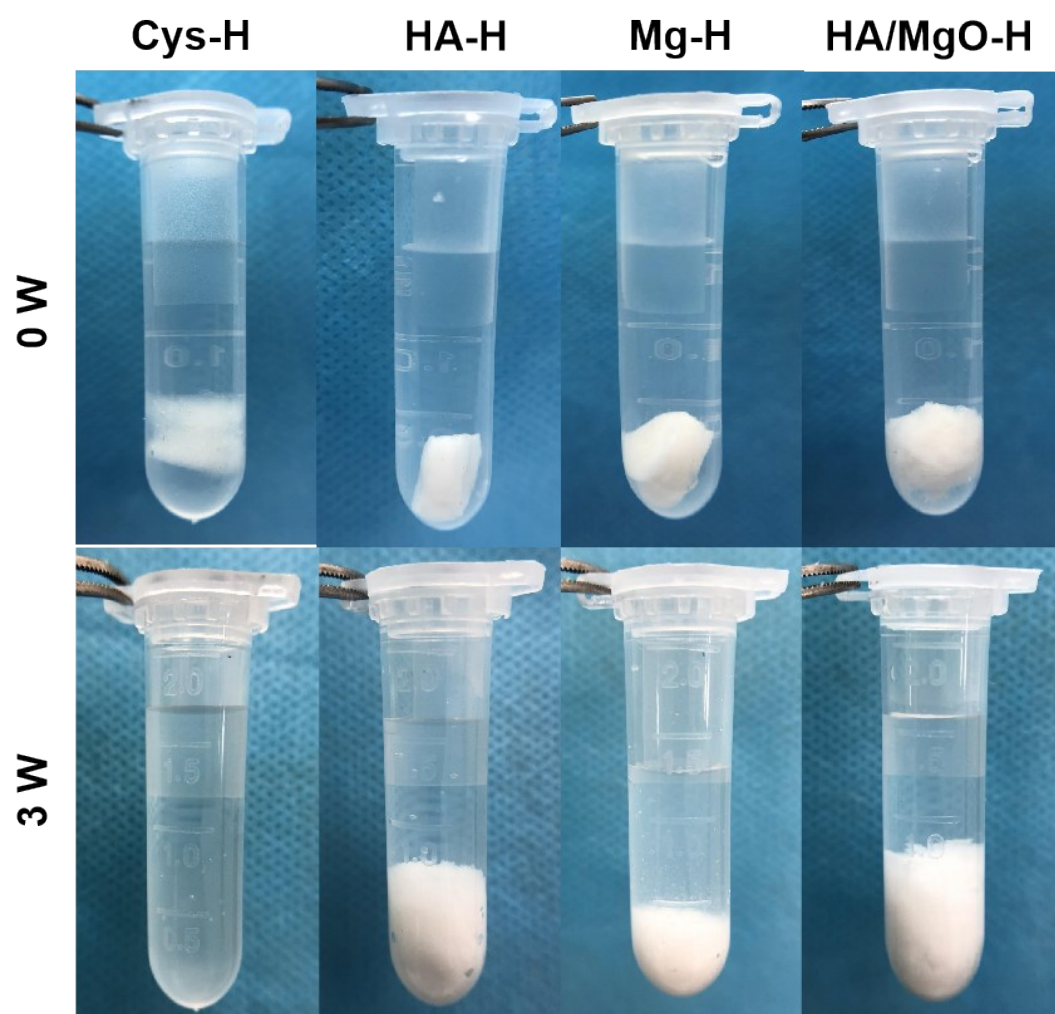

Fig S3 The apparent images of degradation of Cys-H, HA-H, MgO-H and HA/MgO-H scaffold in PBS at 37 °C

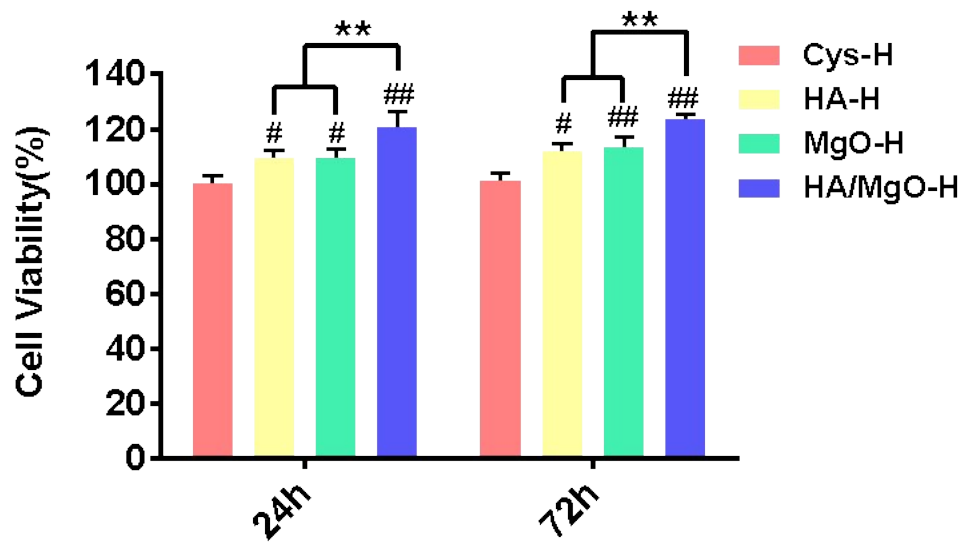

Fig S4 The cell viability of BMSCs treated with different scaffolds soaking solution was evaluated by the MTT assay after incubation for 24 h and 72 h. (# compared with the control group treated with PBS, \*,#  $p < 0.05$ , \*\*,##  $p < 0.01$ ,  $n=3$ ).

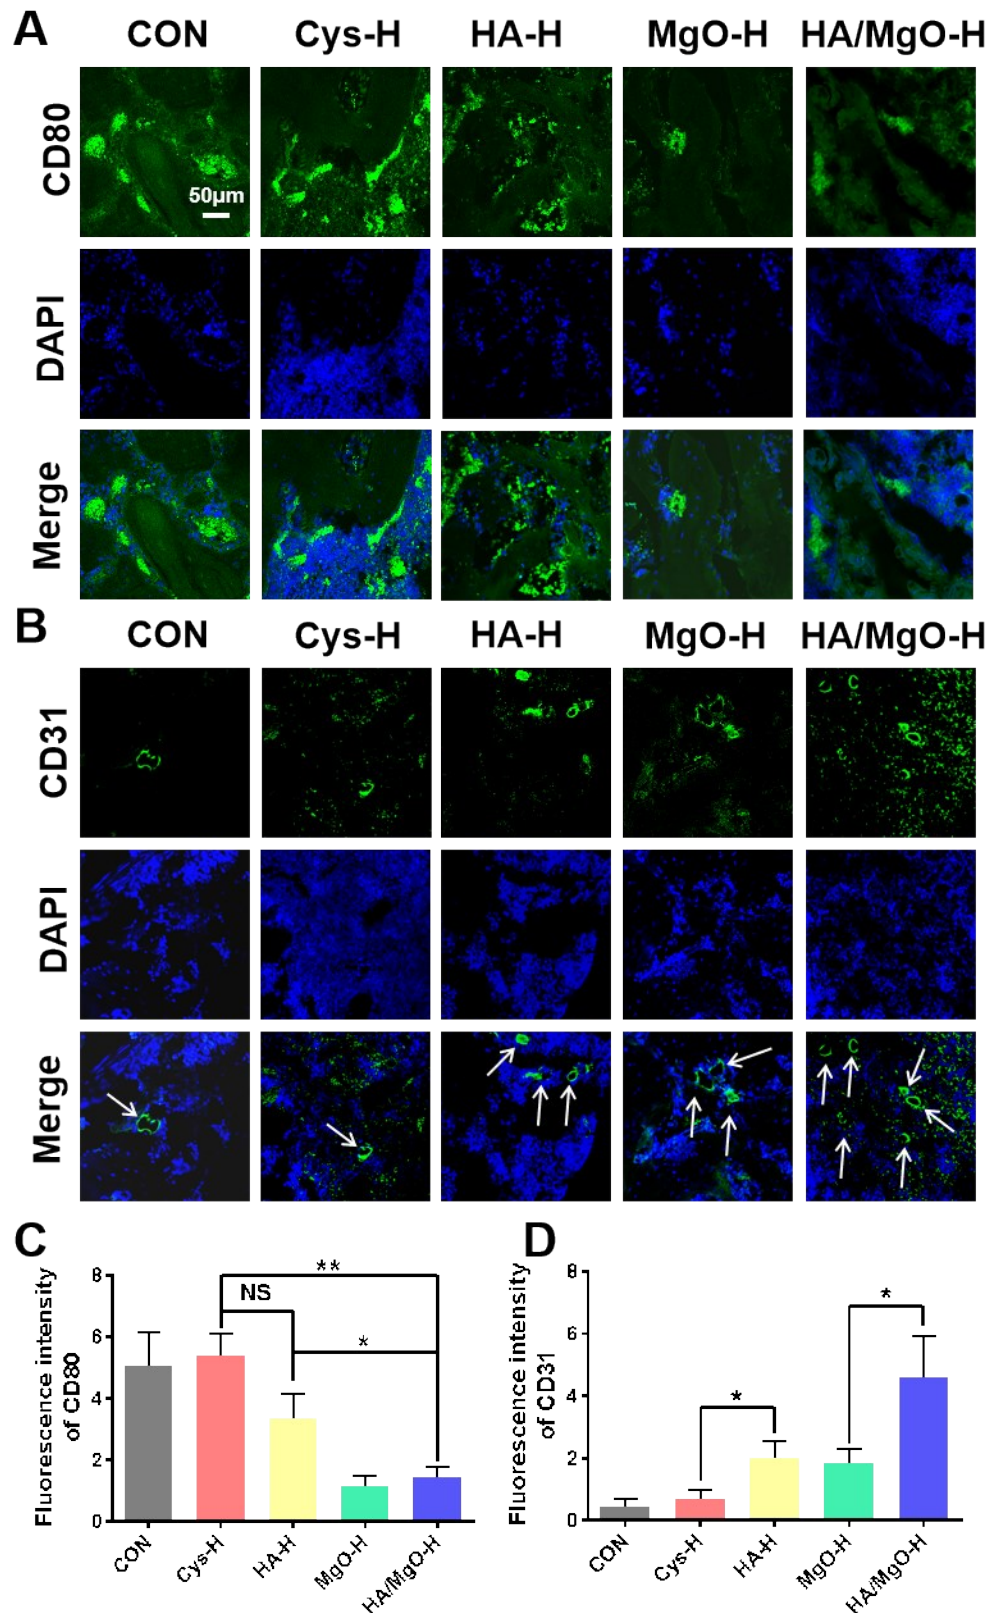

Fig S5 Immunofluorescence staining of (A) CD80 (green) and (B) CD31 (green) of bone defects repair at 4 weeks after the different treatments. (white arrows indicated the microvessels); semi-quantification analysis of (C) CD80-positive and (D) CD31-

positive cells using Image J. (\*  $p < 0.05$ , \*\*  $p < 0.01$ , NS means no statistical significance,  $n=3$ ).
